## Major Adverse Events and Relationship to *Nil per Os* Status in Pediatric Sedation/Anesthesia outside the Operating Room: A Report of the Pediatric Sedation Research Consortium: Erratum: Erratum

In the May 2016 issue, the erratum on page 1202 published Online First (Publish Ahead-of-Print) using an incorrect DOI. The DOI used when the erratum published in the issue (10.1097/01.anes.0000481945.07566.3c) is the correct one.

### Reference

Major adverse events and relationship to nil per os status in pediatric sedation/anesthesia outside the operating room: A report of the Pediatric Sedation Research Consortium: Erratum. ANESTHESIOLOGY 2016; 124:1202

## Residual Neuromuscular Block in the Elderly: Incidence and Clinical Implications: Erratum: Erratum

In the May 2016 issue, the erratum on page 1201 published Online First (Publish Ahead-of-Print) using an incorrect DOI. The DOI used when the erratum published in the issue (10.1097/01.anes.0000481944.99941.7e) is the correct one.

### Reference

Residual neuromuscular block in the elderly: Incidence and clinical implications: Erratum. ANESTHESIOLOGY 2016; 124:1201
